# 1                    **The acute toxicity of Oxydemeton-methyl in zebrafish**

2                                            Guofeng Jia, Xiecheng Liu

3    Department of Health Management, Qingdao Municipal Hospital, Qingdao 266021,  
4    Shandong, China.

5

6

7    Corresponding author: Dr. Guofeng Jia

8

9

10

11    **Running title:** Toxicity of Oxydemeton-methyl in zebrafish

12

13

14    **Key words:** Oxydemeton-methyl; toxicity; cytochrome P450; ROS; DNA damage;  
15    oxidative stress; zebrafish

16

17

18

19

20

21

22

23

## Abstract

Oxydemeton-methyl, is an organothiophosphate insecticide, which is widely used in agricultural and urban pest controls. It exists in the environment and a large amount bioaccumulation in the wildlife due to its strong water solubility and mobility. Although its potentially harmful effect on animals and humans, few studies have focused on the oxydemeton-methyl pollution in the environment. Zebrafish have been used for many years to valuate the pollution status of water and toxicity of chemicals. In the present study, we aimed to investigate the effect of oxydemeton-methyl on the expression level of liver microsomal cytochrome P450, on the activity of NADPH-P450 reductase and reactive oxygen species (ROS) generation in zebrafish. Adult male and female zebrafish were treated with different concentration of oxydemeton-methyl (10, 50, 100  $\mu$ M) for 5, 10, 20 and 30 days. We found that the oxydemeton-methyl exposure significantly increased the P450 levels and the activity of NADPH-P450 reductase. ROS generation and the DNA damage were augmented in a dose-dependent manner in the zebrafish. These results indicated that oxydemeton-methyl is able to induce strong oxidative stress and hence highly toxic to the zebrafish.

## Introduction

Oxydemeton-methyl is a widely organothiophosphate insecticide, which has primarily used to control pest [1-4]. Many countries have realized the high toxicity of oxydemeton-methyl to wildlife and made restriction or ban of the usage of this pesticide [5-7]. However, oxydemeton-methyl remains to be one of the most frequently used organophosphorus insecticides. The high water solubility and mobility led to significant harmful residues in the environment.

Studies on toxicity testing are usually conducted in mammalian models, such as rodents and rabbits [8, 9]. Whatever these tests are commonly expensive and require a large amount of animals. Fish, like many other animal species in the aquatic environment, has been widely used to investigate the toxicology of organophosphorus insecticides [10-13]. Zebrafish has been shown to be a valuable animal model to assess the effect of pollutants to the aquatic ecosystems [14-18]. Zebrafish is a useful experimental model for investigating vertebrate development because of its transparent embryos, low maintaining cost, conservation of key genes and signaling and easily genetic modification [19-25]. Hence, zebrafish has become increasingly common in compounds screening and drug discovery for evaluation of the toxicity mechanisms and also in drug selection and optimization [26-29]. The potential impacts of oxydemeton-methyl to the fish and the increased bioaccumulation effects of the toxicant in wildlife still need be further explored.

One of the most important manifestations in fish is oxidative stress. Increased ROS levels, antioxidant defense systems impairment and loss function of the oxidative self-repair can result in potential damage to fish [30-35]. The level of cytochrome P450

enzymes has been well established in fish as a monitoring indicator for evaluating of environmental contamination and ecotoxicology experiments [36-40].

In the present study, we examined the sensitivity of various biomarkers in zebrafish exposed to oxydemeton-methyl, thus gain a further understanding of the impacts of oxydemeton-methyl to the aquatic ecosystem.

## **Materials and methods**

### **Chemicals**

All chemicals (analytical standard) used in this study were purchased from Sigma-aldrich.

### **Zebrafish husbandry**

The wild type zebrafish (*Danio rerio*) were maintained at 28.5 °C on a 10-hours dark and 14-hours light cycle. All procedures were approved from the Qingdao Municipal Hospital Institutional Animal Care and Use Committee (2017N000105).

### **Oxydemeton-methyl exposure**

Six-month old adult male and female zebrafish were separated and housed in fish tanks. The body weight of male and female zebrafish were  $0.45 \pm 0.05$  g and  $0.52 \pm 0.08$  g, respectively; and the length of male and female zebrafish were similar to  $3.5 \pm 0.3$  cm. Both groups were treated with or without oxydemeton-methyl (10, 50, 100  $\mu$ M) and samples were collected at 5, 10, 20 and 30 days post exposure. The fish were fed twice daily with commercial fish food and starved overnight prior to examination to avoid the effects of feces during the procedures of the assays. Half of the fish water was changed daily during the period of exposure to maintain the stable concentrations of oxydemeton-methyl.

### **Protein measurement**

The protein concentration was measured by using the Pierce BCA Protein Assay Kit (Thermo Fisher Scientific) according to the manufactures' instruction.

### **Isolation of liver microsomes**

The zebrafish were anesthetized in 0.4% tricaine (MS-222) and transferred to a moist sponge for surgery on ice. The livers were dissected and rinsed with ice-cold 1× PBS (137 mM NaCl, 2.7 mM KCl, 10 mM Na<sub>2</sub>HPO<sub>4</sub>, 1.8 mM KH<sub>2</sub>PO<sub>4</sub>, PH 7.4). The livers were transferred to ice-cold homogenization buffer (0.1 M sodium phosphate buffer, 1 mM EDTA, 0.1 mM DTT and 0.1 mM PMSF, PH 7.5) with 10% (v/v) glycerol and homogenized. The homogenate was centrifuged at 16,000 g for 20 min at 4 °C and the supernatant was centrifuged at 100,000 g for 1 hour at 4 °C. The microsomal pellet was collected in homogenization buffer with 20 % (v/v) glycerol and stored at -80 °C.

### **P450 enzyme activities**

The cytochrome P450 content and NADPH-P450 reductase activity were determined as described somewhere else [41, 42].

### **Antioxidant enzymes activities**

The homogenate was centrifuged at 16,000 g for 20 min at 4 °C, and the supernatant was collected and used for determination of the enzyme activity and protein concentrations.

By determining the inhibition of SOD to the photochemical reduction of nitroblue tetrazolium chloride (NBT), the SOD and CAT activity was measured as described previously [43-46].

## **ROS production**

The ROS production was determined according to the method described previously [47-49].

## **Statistical analysis**

Statistical analysis was performed using SPSS (IBM, Armonk, NY). Graphs were plotted using Prism Graph Pad software (6.0). Two-way ANOVA for repeated measurements used to determine the differences between duration and concentrations. All the values were presented as mean  $\pm$  SEM.  $P \leq 0.05$  was considered statistically significant by Student's t tests.

## **Results**

### **Exposure to oxydemeton-methyl impaired cytochrome P450 and NADPH-P450 reductase activities**

Compared to male fish treated with oxydemeton-methyl, the cytochrome P450 contents were higher in the female fish at the same exposed concentrations (Fig. 1). The P450 contents were increased and reached a maximum at the 10 days and then the induction showed a decreasing trend (Fig. 1). The P450 contents were higher at all experiment duration in the exposed fish compared to the controls.

The NADPH-P450 reductase (NCR) activity of oxydemeton-methyl treated fish was higher than the controls at all concentration during the exposure (Fig. 2). Oxydemeton-methyl significantly induced the NCR activity, and which was higher in the female than the male fish treated with the same concentrations. The NCR activity reached a maximum at 20 days both in the male and female fish exposed to oxydemeton-methyl (Fig. 2).

### **Exposure to oxydemeton-methyl inhibited anti-oxidative enzymes activity**

During exposure, oxydemeton-methyl significantly inhibited the SOD activity in both male and female fish consistently over time (Fig. 3). The SOD activity of the female fish was higher than the same concentration treated male fish.

The CAT activity was induced by low concentration of oxydemeton-methyl (10  $\mu$ M) and inhibited by higher concentration and showed a consistent decrease during the exposure (Fig. 4). The CAT activity in the female fish was higher than in the male fish when treated with the same concentrations of oxydemeton-methyl, and which reached a



maximum at 10 days. The CAT activity in the male fish reached the maximum at 20 days.

### **Effect of oxydemeton-methyl treatment on ROS production**

The ROS production was significantly activated by oxydemeton-methyl treatment. Compared to the controls, the ROS levels in the exposed fish were higher, and had a tendency to increase at all oxydemeton-methyl concentration (Fig. 5). The ROS levels were higher in the female than the male fish, which may reflected some sex differences.

## Discussion

Our data showed that oxydemeton-methyl exposure could affect the cytochrome P450 and ROS contents, SOD NCR and CAT activities in the zebrafish. Cytochrome P450 enzymes activities are useful marks that can be used in environmental contamination biomonitoring and xenobiotic metabolism tests [50-52]. The P450 contents were impacted by oxydemeton-methyl treatment and the stimulation trend appeared an initial increase followed by a significant decrease over time. The alteration of NCR would affect the function of the monooxygenase system [53]. We found that cytochrome P450 affect the activity of NCR, which might be the role of P450 enzyme activity in detoxification.

The activity of SOD and CAT was significantly induced by oxydemeton-methyl treatment, which might due to oxydemeton-methyl increased ROX production in the exposed zebrafish. Increased CAT and SOD activities eliminate the redundant ROS and maintain ROS levels at a steady-state concentration [54, 55]. ROS, including a large amount of reactive chemically molecules derived from oxygen, are generated during normal physiological process in all aerobic organisms [56, 57]. ROS can directly damage cellular components and affect cell function [58-60]. Oxydemeton-methyl treatment significantly increased ROS levels in zebrafish, suggested its high toxicity which caused the organisms were not able to eliminate the exceed ROS. The generation of ROS might damage membrane lipids, DNA, protein metabolism and barbohydrate activities.

Our study showed that the cytochrome P450 and ROS content, SOD, CAT and NCR activities were higher in female than in male fish, that suggested the sex differences can affect enzyme activity. These results indicated that female zebrafish could be a good

227 biological indicator in pollution evaluation. Our study could provide a basic theory to  
 228 further studies of toxicity mechanisms of oxydemeton-methyl in animals.

229  
 230  
 231  
 232  
 233  
 234  
 235  
 236  
 237  
 238  
 239  
 240  
 241  
 242  
 243  
 244  
 245  
 246  
 247  
 248  
 249  
 250  
 251  
 252  
 253  
 254  
 255  
 256  
 257  
 258  
 259  
 260  
 261  
 262  
 263  
 264  
 265  
 266  
 267  
 268  
 269  
 270

## References

1. Ghadamyari, M., et al., *Oxydemeton-methyl resistance, mechanisms, and associated fitness cost in green peach aphids (Hemiptera: Aphididae)*. Journal of economic entomology, 2008. **101**(4): p. 1432-1438.
2. Schuphan, I. and J.E. Casida, *Metabolism and degradation of pesticides and xenobiotics: bioactivations involving sulfur-containing substituents*. Mode of Action, Metabolism and Toxicology: Pesticide Chemistry: Human Welfare and the Environment, 2013. **3**: p. 287.
3. Htndin, E., *Residue analyses in water resources*. Analytical methods for pesticides, plant growth regulators, and food additives, 2013. **5**: p. 83.
4. Anitha, K., S.V. Mohan, and S.J. Reddy, *Development of acetylcholinesterase silica sol-gel immobilized biosensor—an application towards oxydemeton methyl detection*. Biosensors and bioelectronics, 2004. **20**(4): p. 848-856.
5. Fan, A.M. and R.J. Jackson, *Pesticides and food safety*. Regulatory toxicology and pharmacology, 1989. **9**(2): p. 158-174.
6. Kumar, S., G. Kaushik, and J.F. Villarreal-Chiu, *Scenario of organophosphate pollution and toxicity in India: A review*. Environmental Science and Pollution Research, 2016. **23**(10): p. 9480-9491.
7. Moses, M., *Pesticide-related health problems and farmworkers*. AAOHN Journal, 1989. **37**(3): p. 115-130.
8. Bondarenko, O., et al., *Toxicity of Ag, CuO and ZnO nanoparticles to selected environmentally relevant test organisms and mammalian cells in vitro: a critical review*. Archives of toxicology, 2013. **87**(7): p. 1181-1200.

- 295 9. Guilhermino, L., et al., *Acute toxicity test with Daphnia magna: an alternative to*  
296 *mammals in the prescreening of chemical toxicity?* Ecotoxicology and  
297 environmental safety, 2000. **46**(3): p. 357-362.
- 298 10. Fulton, M.H. and P.B. Key, *Acetylcholinesterase inhibition in estuarine fish and*  
299 *invertebrates as an indicator of organophosphorus insecticide exposure and*  
300 *effects.* Environmental Toxicology and Chemistry, 2001. **20**(1): p. 37-45.
- 301 11. Monteiro, D.A., et al., *Oxidative stress biomarkers in the freshwater characid*  
302 *fish, Brycon cephalus, exposed to organophosphorus insecticide Folisuper 600*  
303 *(methyl parathion).* Comparative Biochemistry and Physiology Part C:  
304 Toxicology & Pharmacology, 2006. **143**(2): p. 141-149.
- 305 12. Fanta, E., et al., *Histopathology of the fish Corydoras paleatus contaminated with*  
306 *sublethal levels of organophosphorus in water and food.* Ecotoxicology and  
307 environmental safety, 2003. **54**(2): p. 119-130.
- 308 13. Rao, J.V., *Toxic effects of novel organophosphorus insecticide (RPR-V) on*  
309 *certain biochemical parameters of euryhaline fish, Oreochromis mossambicus.*  
310 Pesticide Biochemistry and Physiology, 2006. **86**(2): p. 78-84.
- 311 14. Parng, C., *In vivo zebrafish assays for toxicity testing.* Current opinion in drug  
312 discovery & development, 2005. **8**(1): p. 100-106.
- 313 15. Zhong, L., et al., *Investigation of effect of 17 $\alpha$ -ethinylestradiol on vigilin*  
314 *expression using an isolated recombinant antibody.* Aquatic toxicology, 2014.  
315 **156**: p. 1-9.

- 316 16. Hollert, H., et al., *A new sediment contact assay to assess particle-bound*  
317 *pollutants using zebrafish (Danio rerio) embryos*. Journal of Soils and Sediments,  
318 2003. **3**(3): p. 197.
- 319 17. CARVAN, M.J., et al., *Transgenic zebrafish as sentinels for aquatic pollution*.  
320 Annals of the New York Academy of Sciences, 2000. **919**(1): p. 133-147.
- 321 18. Raldúa, D. and P.J. Babin, *Simple, rapid zebrafish larva bioassay for assessing*  
322 *the potential of chemical pollutants and drugs to disrupt thyroid gland function*.  
323 Environmental science & technology, 2009. **43**(17): p. 6844-6850.
- 324 19. Gu, Q., et al., *Genetic ablation of solute carrier family 7a3a leads to hepatic*  
325 *steatosis in zebrafish during fasting*. Hepatology, 2014. **60**(6): p. 1929-1941.
- 326 20. Zhai, G., et al., *Sept6 is required for ciliogenesis in Kupffer's vesicle, the*  
327 *pronephros, and the neural tube during early embryonic development*. Molecular  
328 and cellular biology, 2014. **34**(7): p. 1310-1321.
- 329 21. Song, G., et al., *Effective gene trapping mediated by Sleeping Beauty transposon*.  
330 PloS one, 2012. **7**(8): p. e44123.
- 331 22. Gu, Q., et al., *Generation and characterization of a transgenic zebrafish*  
332 *expressing the reverse tetracycline transactivator*. Journal of Genetics and  
333 Genomics, 2013. **40**(10): p. 523-531.
- 334 23. Yang, X., et al., *Nucleoporin 62-like protein activates canonical Wnt signaling*  
335 *through facilitating the nuclear import of  $\beta$ -catenin in zebrafish*. Molecular and  
336 cellular biology, 2015. **35**(7): p. 1110-1124.
- 337 24. Gu, Q. and Z. Cui, *Putative Role of Cationic Amino Acid Transporter-3 in Murine*  
338 *Liver Metabolism Reply*. 2015.

- 339 25. Gu, Q. and Z. Cui, *Nitric Oxide as a Protector From Nonalcoholic Fatty Liver*  
340 *Disease Reply*. 2015.
- 341 26. Zon, L.I. and R.T. Peterson, *In vivo drug discovery in the zebrafish*. Nature  
342 reviews Drug discovery, 2005. **4**(1): p. 35-44.
- 343 27. Rubinstein, A.L., *Zebrafish: from disease modeling to drug discovery*. Current  
344 Opinion in Drug Discovery and Development, 2003. **6**(2): p. 218-223.
- 345 28. Chakraborty, C., et al., *Zebrafish: a complete animal model for in vivo drug*  
346 *discovery and development*. Current drug metabolism, 2009. **10**(2): p. 116-124.
- 347 29. Rubinstein, A.L., *Zebrafish assays for drug toxicity screening*. Expert opinion on  
348 drug metabolism & toxicology, 2006. **2**(2): p. 231-240.
- 349 30. Gultekin, F., et al., *In vivo changes in antioxidant systems and protective role of*  
350 *melatonin and a combination of vitamin C and vitamin E on oxidative damage in*  
351 *erythrocytes induced by chlorpyrifos-ethyl in rats*. Archives of toxicology, 2001.  
352 **75**(2): p. 88-96.
- 353 31. Kelly, K., et al., *Oxidative stress in toxicology: established mammalian and*  
354 *emerging piscine model systems*. Environmental Health Perspectives, 1998.  
355 **106**(7): p. 375.
- 356 32. Halliwell, B. and J.M. Gutteridge, *Free radicals in biology and medicine*. 2015:  
357 Oxford University Press, USA.
- 358 33. Pham-Huy, L.A., H. He, and C. Pham-Huy, *Free radicals, antioxidants in disease*  
359 *and health*. Int J Biomed Sci, 2008. **4**(2): p. 89-96.

- 360 34. Laville, N., et al., *Effects of human pharmaceuticals on cytotoxicity, EROD*  
361 *activity and ROS production in fish hepatocytes*. Toxicology, 2004. **196**(1): p. 41-  
362 55.
- 363 35. Castro, N., et al., *Metabolic costs of aggressive behaviour in the Siamese fighting*  
364 *fish, Betta splendens*. Aggressive Behavior, 2006. **32**(5): p. 474-480.
- 365 36. Andersson, T. and L. Förlin, *Regulation of the cytochrome P450 enzyme system in*  
366 *fish*. Aquatic Toxicology, 1992. **24**(1-2): p. 1-19.
- 367 37. Uno, T., M. Ishizuka, and T. Itakura, *Cytochrome P450 (CYP) in fish*.  
368 Environmental toxicology and pharmacology, 2012. **34**(1): p. 1-13.
- 369 38. Goksøyr, A., *Use of cytochrome P450 1A (CYP1A) in fish as a biomarker of*  
370 *aquatic pollution*, in *Toxicology in Transition*. 1995, Springer. p. 80-95.
- 371 39. Williams, D.E., J.J. Lech, and D.R. Buhler, *Xenobiotics and xenoestrogens in*  
372 *fish: modulation of cytochrome P450 and carcinogenesis*. Mutation  
373 Research/Fundamental and Molecular Mechanisms of Mutagenesis, 1998. **399**(2):  
374 p. 179-192.
- 375 40. Koenig, S., P. Fernández, and M. Solé, *Differences in cytochrome P450 enzyme*  
376 *activities between fish and crustacea: relationship with the bioaccumulation*  
377 *patterns of polychlorobiphenyls (PCBs)*. Aquatic toxicology, 2012. **108**: p. 11-17.
- 378 41. Yamazaki, H., et al., *Roles of NADPH-P450 reductase and apo-and holo-*  
379 *cytochrome b 5 on xenobiotic oxidations catalyzed by 12 recombinant human*  
380 *cytochrome P450s expressed in membranes of Escherichia coli*. Protein  
381 expression and purification, 2002. **24**(3): p. 329-337.



- 382 42. Fisslthaler, B., et al., *Cytochrome P450 2C is an EDHF synthase in coronary*  
383 *arteries*. Nature, 1999. **401**(6752): p. 493-497.
- 384 43. Heckert, E.G., et al., *The role of cerium redox state in the SOD mimetic activity of*  
385 *nanoceria*. Biomaterials, 2008. **29**(18): p. 2705-2709.
- 386 44. Campa-Córdova, A., et al., *Generation of superoxide anion and SOD activity in*  
387 *haemocytes and muscle of American white shrimp (Litopenaeus vannamei) as a*  
388 *response to  $\beta$ -glucan and sulphated polysaccharide*. Fish & shellfish  
389 immunology, 2002. **12**(4): p. 353-366.
- 390 45. Luna, C.M., et al., *Drought controls on H<sub>2</sub>O<sub>2</sub> accumulation, catalase (CAT)*  
391 *activity and CAT gene expression in wheat*. Journal of experimental botany, 2005.  
392 **56**(411): p. 417-423.
- 393 46. Radošević, K., et al., *Evaluation of toxicity and biodegradability of choline*  
394 *chloride based deep eutectic solvents*. Ecotoxicology and environmental safety,  
395 2015. **112**: p. 46-53.
- 396 47. Korenaga, M., et al., *Hepatitis C virus core protein inhibits mitochondrial*  
397 *electron transport and increases reactive oxygen species (ROS) production*.  
398 Journal of Biological Chemistry, 2005. **280**(45): p. 37481-37488.
- 399 48. Szuster-Ciesielska, A., et al., *The inhibitory effect of zinc on cadmium-induced*  
400 *cell apoptosis and reactive oxygen species (ROS) production in cell cultures*.  
401 Toxicology, 2000. **145**(2): p. 159-171.
- 402 49. Wason, M.S., et al., *Sensitization of pancreatic cancer cells to radiation by*  
403 *cerium oxide nanoparticle-induced ROS production*. Nanomedicine:  
404 Nanotechnology, Biology and Medicine, 2013. **9**(4): p. 558-569.

- 405 50. Nebert, D.W. and T.P. Dalton, *The role of cytochrome P450 enzymes in*  
406 *endogenous signalling pathways and environmental carcinogenesis*. Nature  
407 Reviews Cancer, 2006. **6**(12): p. 947-960.
- 408 51. Shaik, S., et al., *Theoretical perspective on the structure and mechanism of*  
409 *cytochrome P450 enzymes*. Chemical reviews, 2005. **105**(6): p. 2279-2328.
- 410 52. Bucheli, T.D. and K. Fent, *Induction of cytochrome P450 as a biomarker for*  
411 *environmental contamination in aquatic ecosystems*. Critical reviews in  
412 environmental science and technology, 1995. **25**(3): p. 201-268.
- 413 53. Leitão, M., et al., *The liver monooxygenase system of Brazilian freshwater fish*.  
414 *Comparative Biochemistry and Physiology Part C: Pharmacology, Toxicology*  
415 *and Endocrinology*, 2000. **126**(1): p. 29-38.
- 416 54. Mylona, P.V. and A.N. Polidoros, *ROS regulation of antioxidant genes*. 2010:  
417 Science Publishers: Enfield, New Hampshire, UK.
- 418 55. Scandalios, J., *Oxidative stress: molecular perception and transduction of signals*  
419 *triggering antioxidant gene defenses*. Brazilian Journal of Medical and Biological  
420 Research, 2005. **38**(7): p. 995-1014.
- 421 56. Krötz, F., H.-Y. Sohn, and U. Pohl, *Reactive oxygen species*. Arteriosclerosis,  
422 thrombosis, and vascular biology, 2004. **24**(11): p. 1988-1996.
- 423 57. Bayr, H., *Reactive oxygen species*. Critical care medicine, 2005. **33**(12): p. S498-  
424 S501.
- 425 58. Powers, S.K. and M.J. Jackson, *Exercise-induced oxidative stress: cellular*  
426 *mechanisms and impact on muscle force production*. Physiological reviews, 2008.  
427 **88**(4): p. 1243-1276.

- 428 59. Finkel, T. and N.J. Holbrook, *Oxidants, oxidative stress and the biology of*  
429 *ageing*. Nature, 2000. **408**(6809): p. 239-247.
- 430 60. Thannickal, V.J. and B.L. Fanburg, *Reactive oxygen species in cell signaling*.  
431 American Journal of Physiology-Lung Cellular and Molecular Physiology, 2000.  
432 **279**(6): p. L1005-L1028.

433

434

435

436

437

438

439

440

441

442

443

444

445

446

447

448

449

450

**Figure 1 Effect of oxydemeton-methyl on the cytochrome P450 contents in zebrafish.**

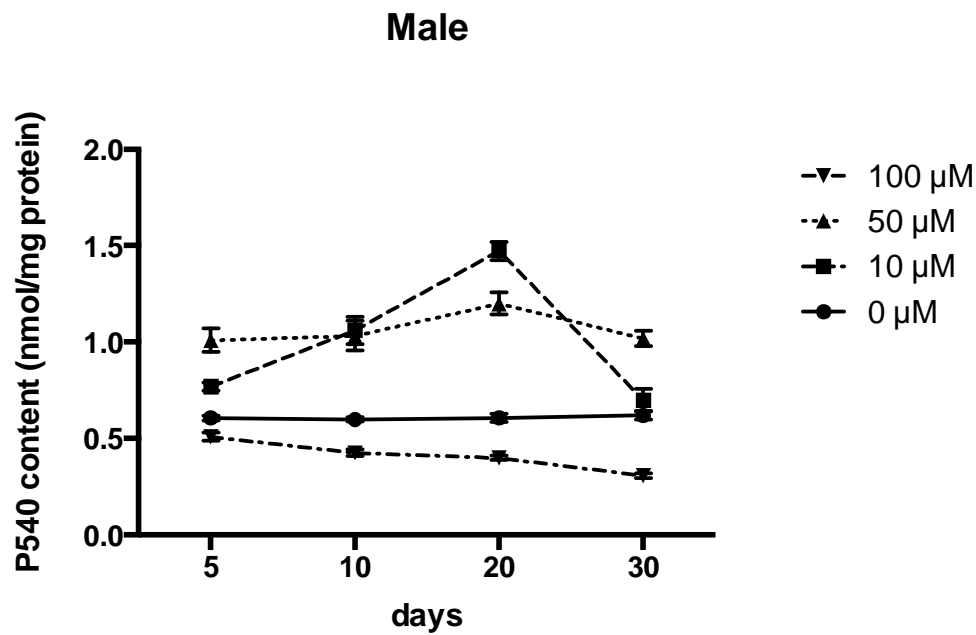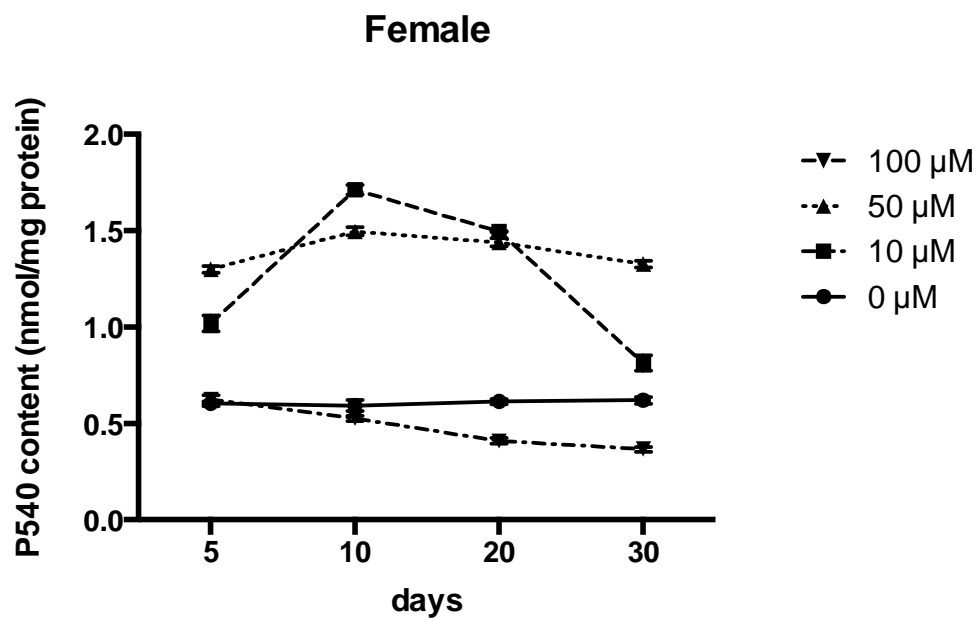

**Figure 2 Effect of oxydemeton-methyl on the NADPH-P450 reductase activity in zebrafish.**

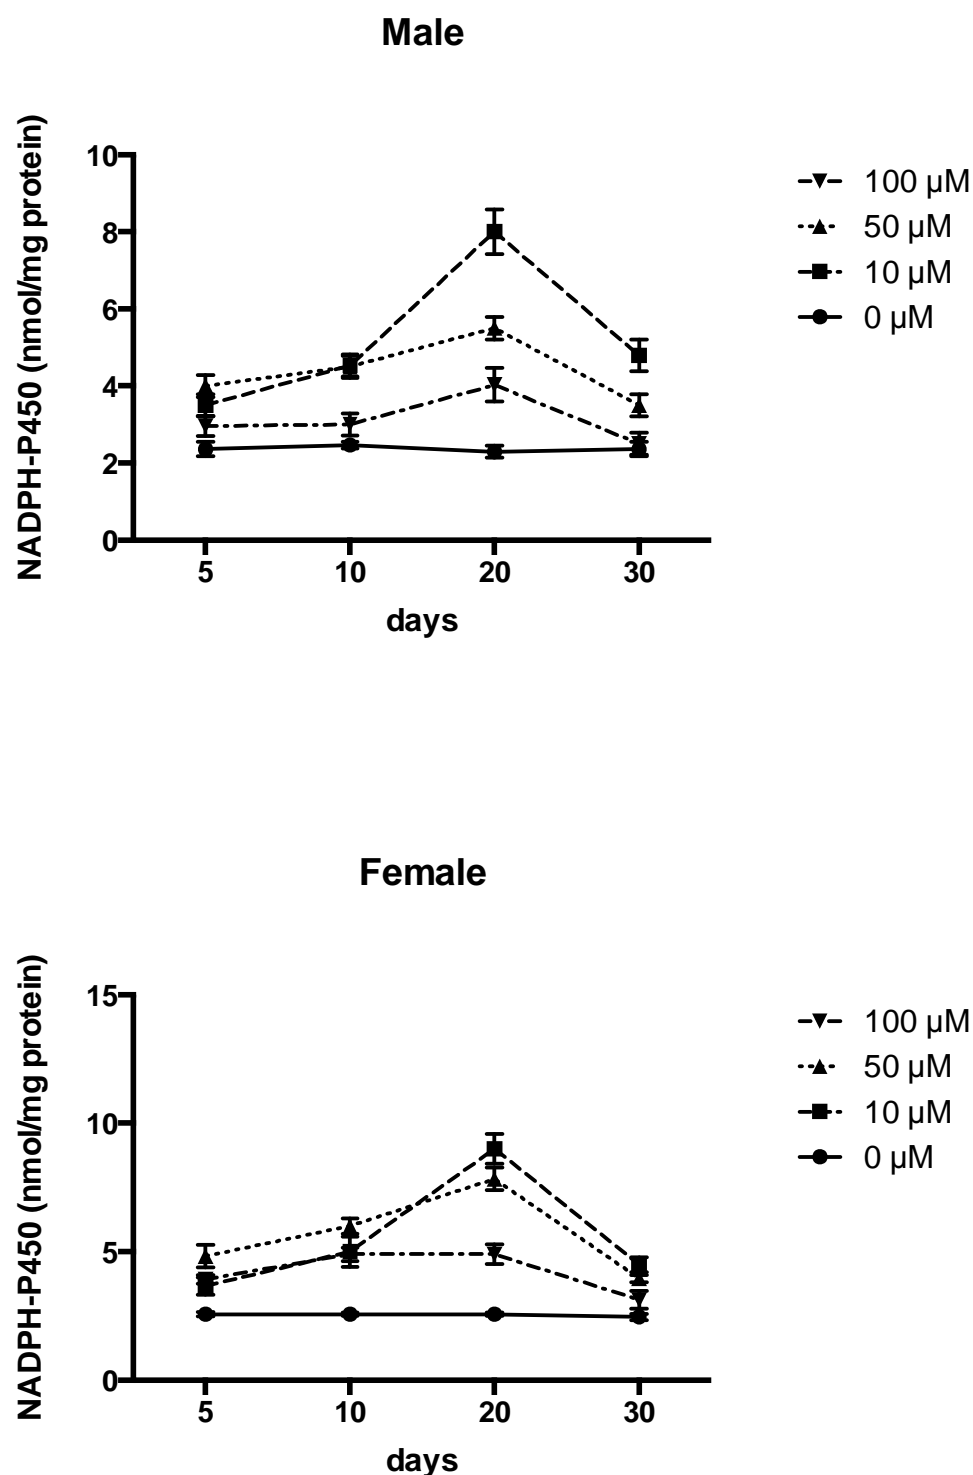

**Figure 3 Effect of oxydemeton-methyl on the SOD activity in zebrafish.**

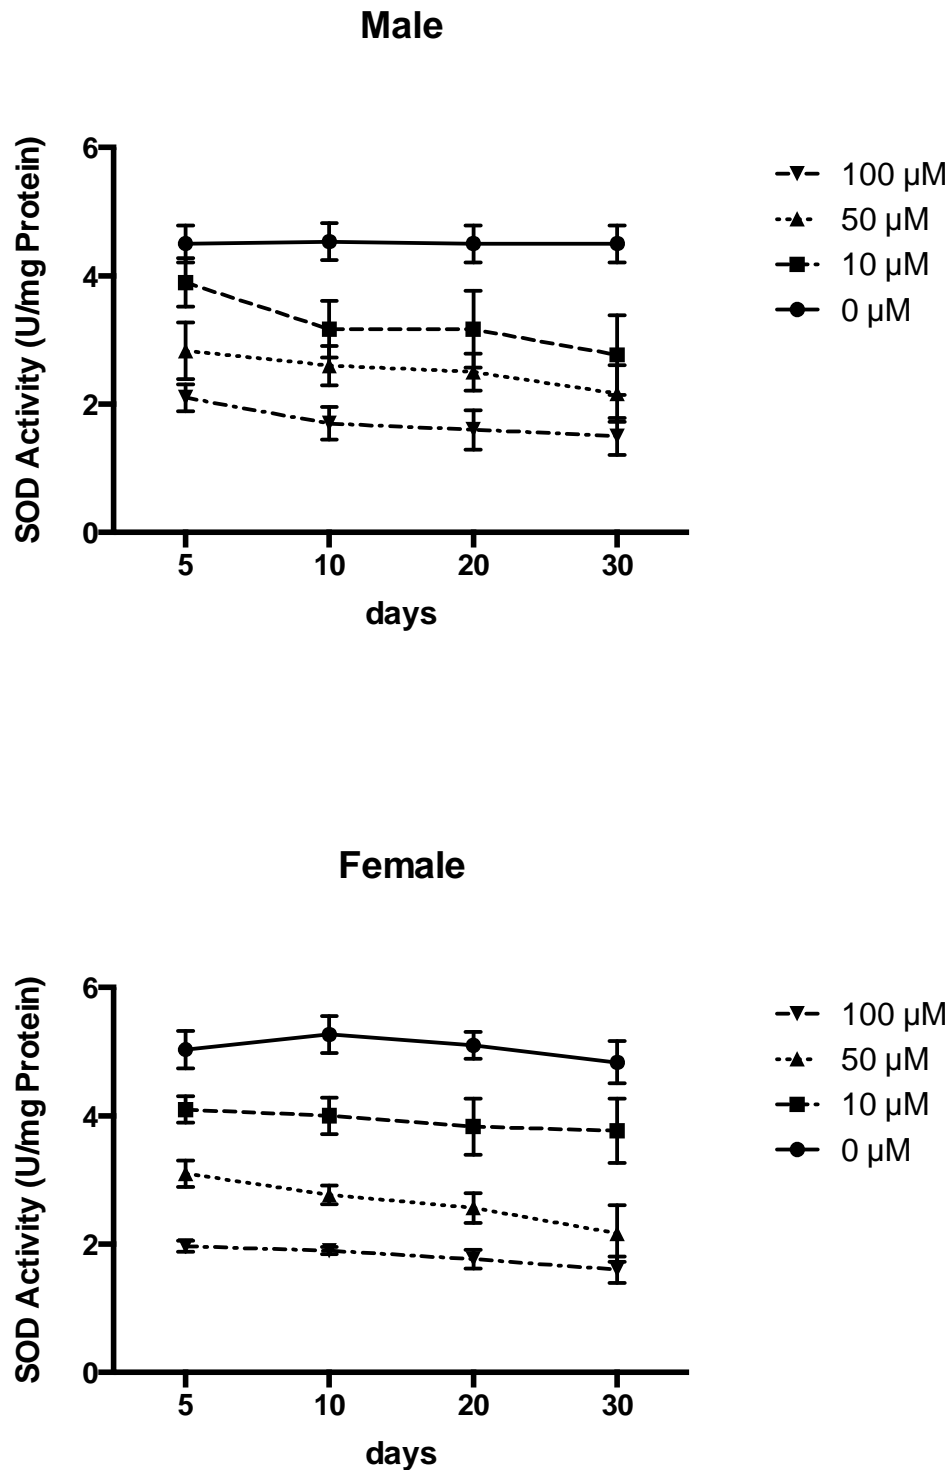

**Figure 4 Effect of oxydemeton-methyl on the CAT activity in zebrafish.**

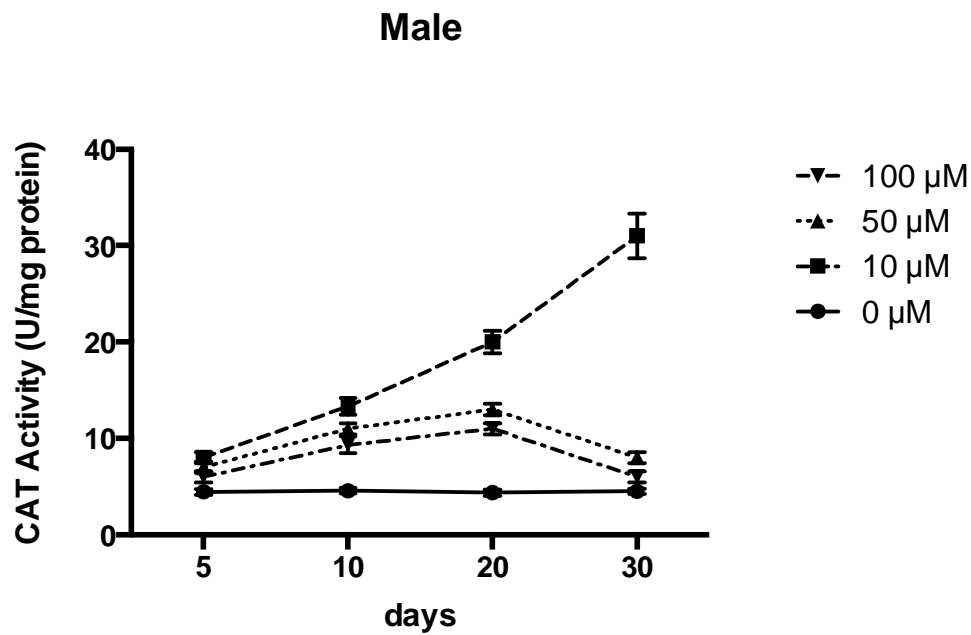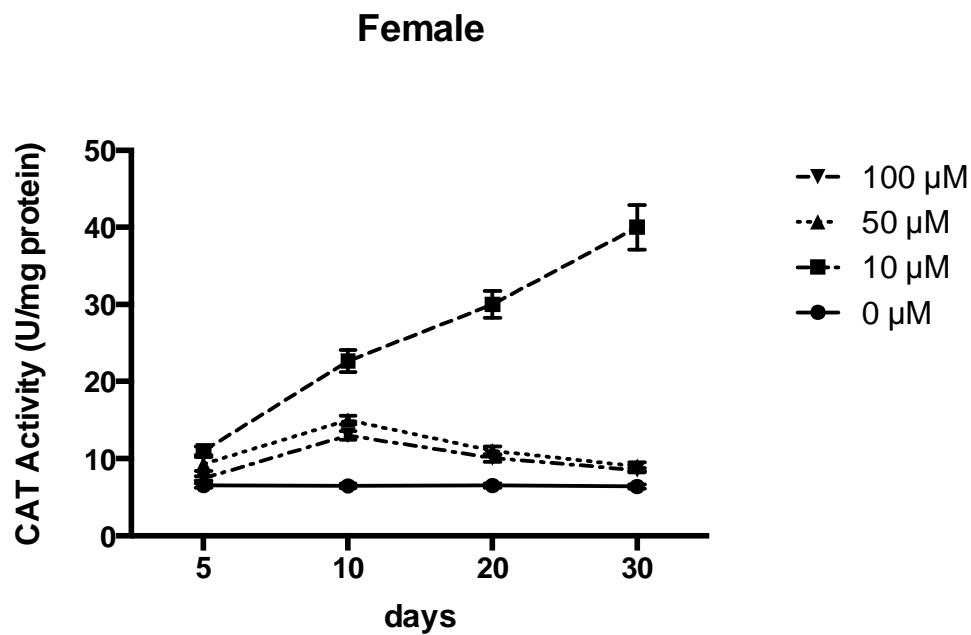

**Figure 5 Effect of oxydemeton-methyl on the ROS production in zebrafish.**

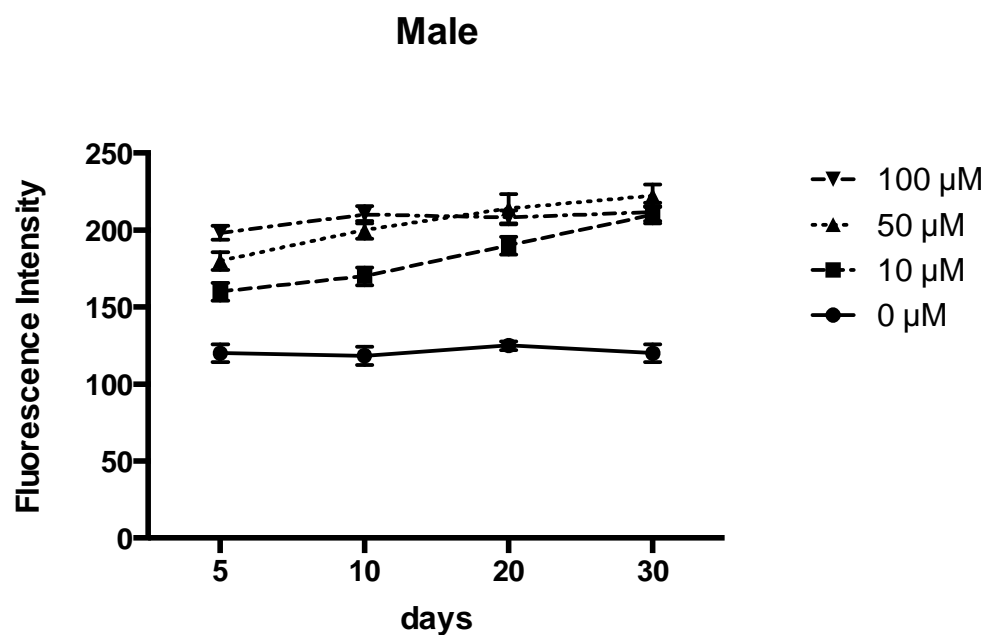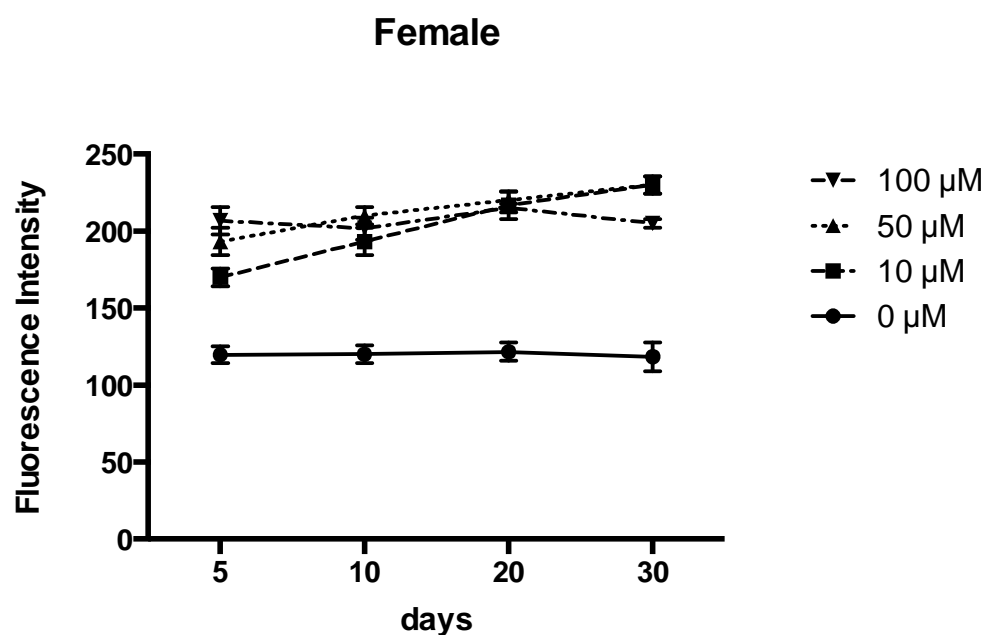

Source: http://biorxiv.org/content/10.1101/119982v1.full.pdf
